# Supplementary figures and images for: The Predictive Role of Biomarkers and Genetics in Childhood Asthma Exacerbations
Source: MDPI journal article supplement (doi:10.3390/ijms22094651), 2021-04-28

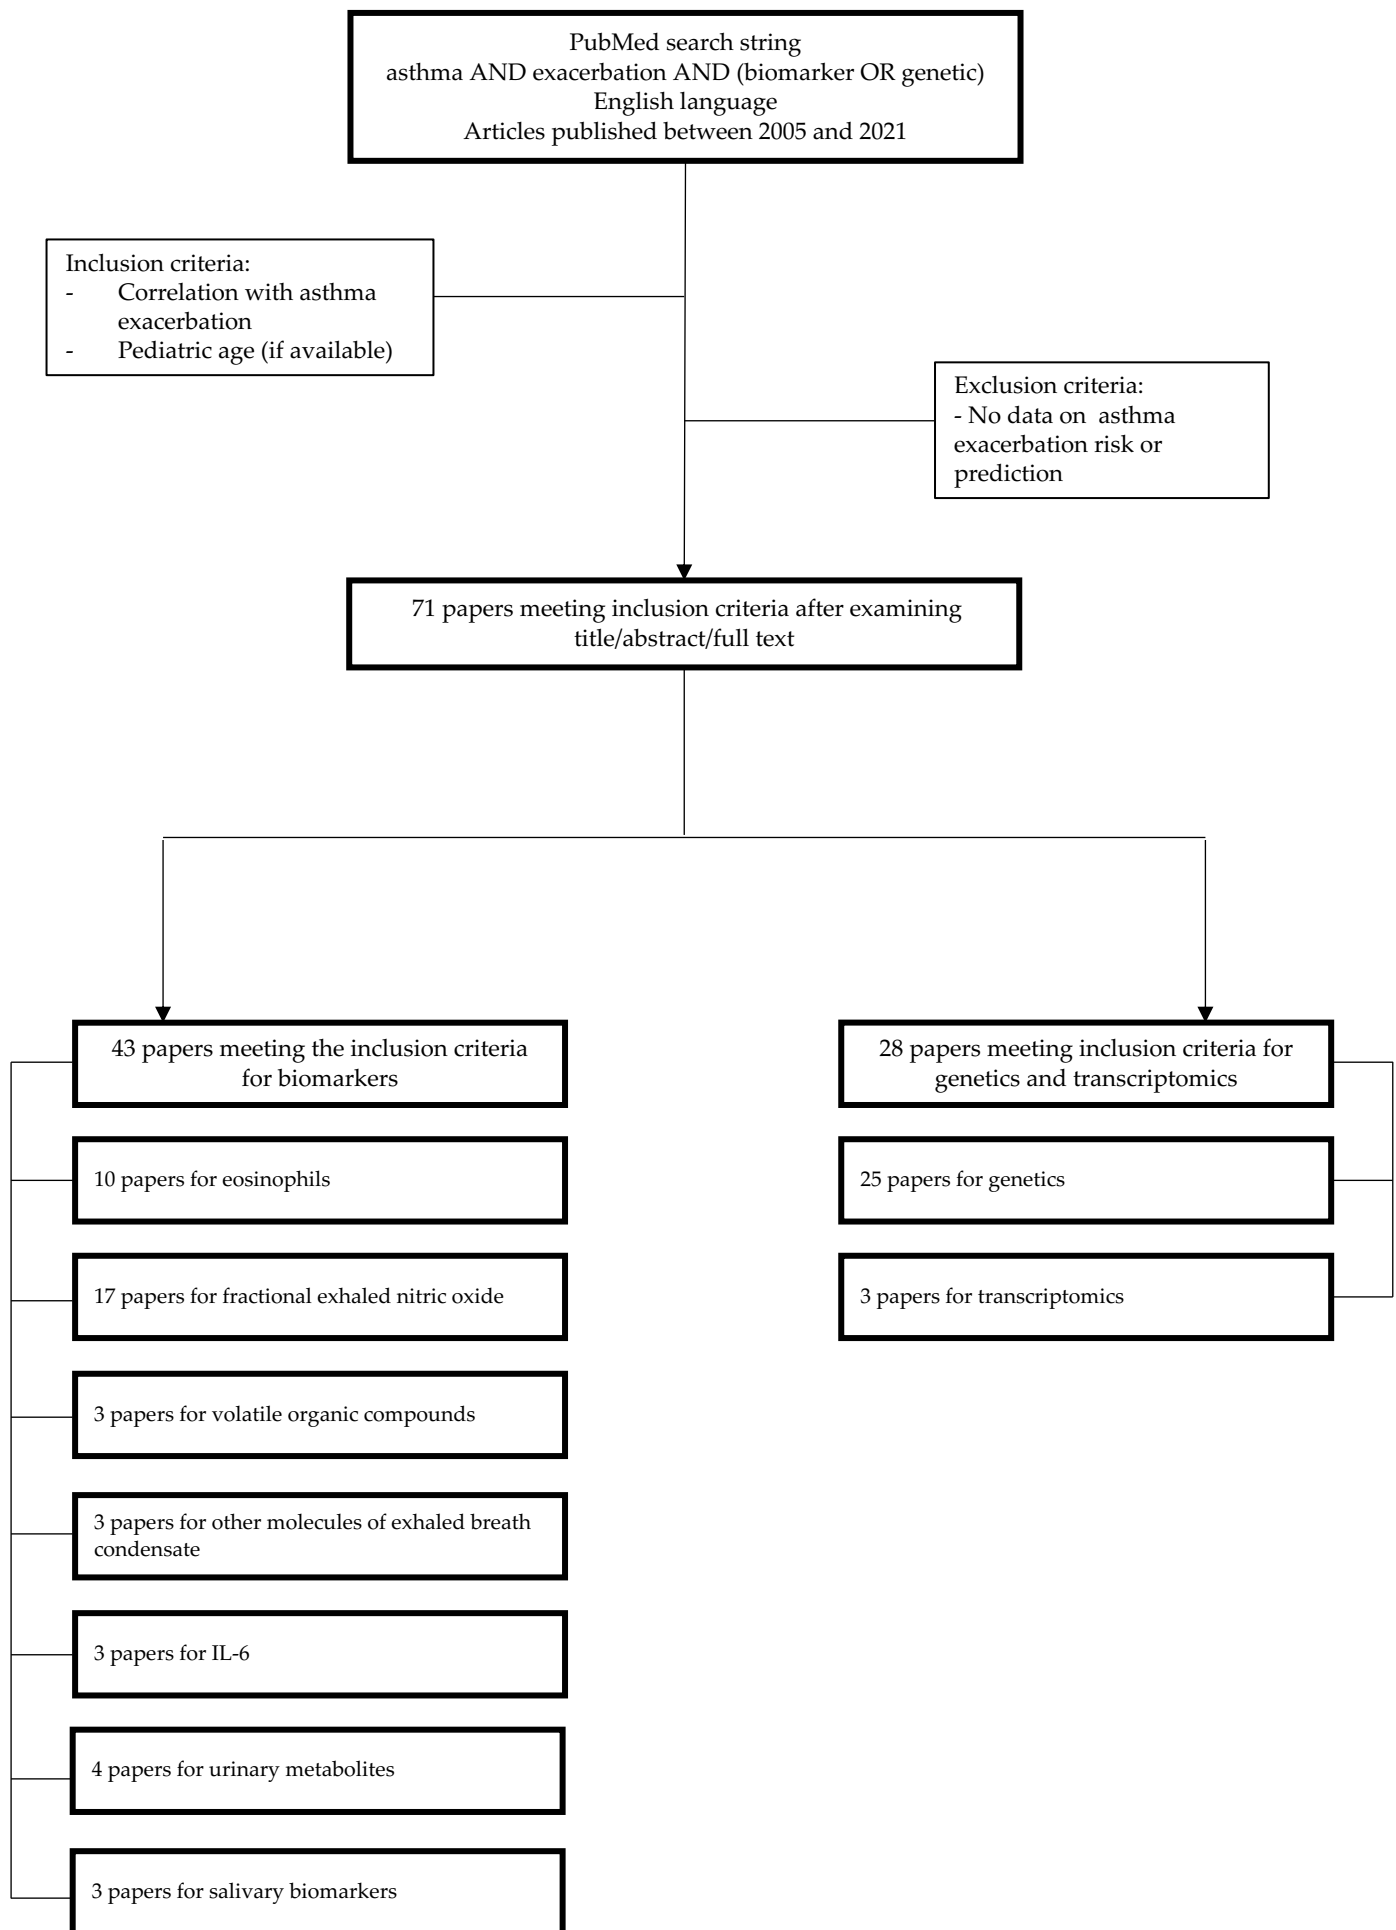

**Figure S1-** Review phases flowchart.

Supplement: s1 [file s1]
